# Supplementary material
Source: PubMed Central journal article supplement (PMC5815903)
Supplement: NIHMS916196-supplement-supplement_1.pdf [file NIHMS916196-supplement-supplement_1.pdf]

**Supplemental Table 1** Days until next cancer treatment for patients who contacted the patient navigator

| Cancer Diagnosis<br>(n=397 <sup>a</sup> )                           | Initiated Fertility<br>Preservation | Did Not Undergo<br>Fertility Preservation | <i>P</i> value |
|---------------------------------------------------------------------|-------------------------------------|-------------------------------------------|----------------|
| Breast Cancer                                                       | n=89                                | n=128                                     | <i>NS</i>      |
| Median                                                              | 37                                  | 21                                        |                |
| (Range)                                                             | (16-95)                             | (0-93)                                    |                |
| Hematologic Cancers<br>(lymphoma, leukemia)                         | n=31                                | n=50                                      | 0.021          |
| Median                                                              | 28                                  | 13                                        |                |
| (Range)                                                             | (18-57)                             | (0-98)                                    |                |
| Gynecologic Cancers<br>(cervical, ovarian, uterine,<br>endometrial) | n=16                                | n=26                                      | <i>NS</i>      |
| Median                                                              | 43                                  | 20                                        |                |
| (Range)                                                             | (21-64)                             | (1-77)                                    |                |
| Other Cancers                                                       | n=20                                | n=37                                      | <i>NS</i>      |
| Median                                                              | 31                                  | 15                                        |                |
| (Range)                                                             | (16-91)                             | (0-98)                                    |                |
| All Cancers                                                         | n=156 <sup>b</sup>                  | n=241 <sup>c</sup>                        | <0.001         |
| Median                                                              | 33                                  | 19                                        |                |

|         |         |        |  |
|---------|---------|--------|--|
| (Range) | (16-95) | (0-98) |  |
|---------|---------|--------|--|

Significance did not change when including patients that required more than 100 days until next cancer treatment. Of note, 3 patients had 2 cycles prior to next treatment.

<sup>a</sup> n=65 did not have exact next cancer treatment date available in our records.

<sup>b</sup> n=16 >100d until next treatment, thus not included for analysis.

<sup>c</sup> n=19 >100d until next treatment, thus not included for analysis.

**Supplemental Table 2** COH cycle characteristics of patients not on oral contraceptive pills who underwent a cycle specific vs. random start protocol and completed an oocyte retrieval

| Stimulation Measures<br>(n=52 <sup>a</sup> ) | Cycle Specific<br>(n=30) | Random Start<br>(n=22) | <i>P</i> value |
|----------------------------------------------|--------------------------|------------------------|----------------|
| Age                                          |                          |                        |                |
| Median                                       | 34                       | 30                     | <i>NS</i>      |
| (Range)                                      | (20-41)                  | (19-39)                |                |
| BMI                                          |                          |                        |                |
| Median                                       | 22.62                    | 24.60                  | <i>NS</i>      |
| (Range)                                      | (17.95-34.11)            | (16.20-34.40)          |                |
| AMH (ng/ml)                                  |                          |                        |                |
| Median                                       | 1.50                     | 4.33                   | <i>NS</i>      |
| (Range)                                      | (0-9.10)                 | (0-10.39)              |                |
| Peak E <sub>2</sub> (pg/ml)                  |                          |                        |                |
| Median                                       | 1313                     | 1432                   | <i>NS</i>      |
| (Range)                                      | (109-3439)               | (55-4341)              |                |
| Number of days of stimulation                |                          |                        |                |
| Median                                       | 10                       | 10                     | <i>NS</i>      |
| (Range)                                      | (7-13)                   | (7-15)                 |                |
| Total FSH Dosage                             |                          |                        |                |

|                                       |                    |                    |           |
|---------------------------------------|--------------------|--------------------|-----------|
| Median<br>(Range)                     | 1875<br>(750-6000) | 1525<br>(750-5400) | <i>NS</i> |
| Total HMG Dosage                      |                    |                    |           |
| Median<br>(Range)                     | 787<br>(375-1350)  | 750<br>(600-1800)  | <i>NS</i> |
| Total number of oocytes<br>retrieved  |                    |                    |           |
| Median<br>(Range)                     | 7<br>(2-55)        | 13<br>(1-30)       | <i>NS</i> |
| Number of mature oocytes<br>retrieved |                    |                    |           |
| Median<br>(Range)                     | 6<br>(0-40)        | 10<br>(1-21)       | <i>NS</i> |
| Number of oocytes<br>cryopreserved    |                    |                    |           |
| Median<br>(Range)                     | 12<br>(0-22)       | 12<br>(0-25)       | <i>NS</i> |
| Number of embryos<br>cryopreserved    |                    |                    |           |
| Median<br>(Range)                     | 4<br>(0-12)        | 6<br>(0-16)        | <i>NS</i> |

|                                            |         |         |    |
|--------------------------------------------|---------|---------|----|
| Days to next cancer treatment <sup>a</sup> | n=24    | n=18    |    |
| Median                                     | 40      | 34      | NS |
| (Range)                                    | (18-71) | (16-85) |    |

*AMH*, anti-Müllerian hormone; *BMI*, body mass index; *COH*, controlled ovarian

hyperstimulation; *E<sub>2</sub>*, estradiol; *HMG*, human menopausal gonadotropin; *PN*, patient navigator.

<sup>a</sup> n=6 that did not have next treatment date available in our records; n=4 >100d thus not included for analysis.

**Supplemental Table 3** Pregnancy outcomes after receiving cancer treatment for fertility

preservation patients that returned to use frozen embryos or oocytes

| Patient Number (n=21) | Age at cryo-preservation | Age at return for implantation | Embryo or oocyte used? | Gestational carrier used? | Outcome                            |
|-----------------------|--------------------------|--------------------------------|------------------------|---------------------------|------------------------------------|
| 1                     | 28.0                     | 30.2                           | Embryo                 | Yes                       | Live singleton birth               |
| 2                     | 29.7                     | 31.8                           | Embryo                 | No                        | Live twin births                   |
| 3                     | 29.8                     | 31.6                           | Embryo                 | No                        | Live singleton birth               |
| 4                     | 30.3                     | 36.4                           | Embryo                 | No                        | Live singleton birth               |
| 5                     | 30.8                     | 33.7                           | Embryo                 | No                        | No pregnancy                       |
| 6                     | 31.3                     | 35.6                           | Embryo                 | No                        | No pregnancy                       |
| 7                     | 31.4                     | 32.6                           | Embryo                 | No                        | No pregnancy                       |
| 8                     | 31.7                     | 33.2                           | Embryo                 | No                        | Live singleton birth               |
| 9                     | 32.0                     | 34.9                           | Embryo                 | No                        | Live twin births                   |
| 10                    | 33.1                     | 35.2                           | Embryo                 | Yes                       | Live singleton birth               |
| 11                    | 34.9                     | 40.6                           | Embryo                 | No                        | No pregnancy                       |
| 12                    | 36.3                     | 41.0                           | Embryo                 | No                        | No pregnancy                       |
| 13                    | 36.3                     | 37.7                           | Embryo                 | Yes                       | Live singleton birth               |
| 14                    | 37.1                     | 38.2                           | Embryo                 | No                        | Live singleton birth               |
| 15                    | 37.6                     | 38.1                           | Embryo                 | #1: No<br>#2: Yes         | Two separate live singleton births |
| 16                    | 38.9                     | 41.9                           | Embryo                 | No                        | Live singleton birth               |
| 17                    | 40.1                     | 41.1                           | Embryo                 | Yes                       | No pregnancy                       |
| 18                    | 41.3                     | 43.1                           | Embryo                 | No                        | No pregnancy                       |
| 19                    | 42.5                     | 43.1                           | Embryo                 | Yes                       | No pregnancy                       |
| 20                    | 25.6                     | 31.6                           | Oocyte                 | Yes                       | No pregnancy                       |
| 21                    | 41.1                     | 42.3                           | Oocyte                 | No                        | Live twin births                   |
